# Supplementary material for: Plant Functional Niches in Forests Across Four Climatic Zones: Exploring the Periodic Table of Niches Based on Plant Functional Traits
Source: Front Plant Sci. 2020 Jun 17;11:841. doi: 10.3389/fpls.2020.00841 (PMC7311788; doi:10.3389/fpls.2020.00841)
Supplement: Supplementary file 1 [file Data_Sheet_1.xlsx]

## Sheet: Table S1
Table S1 The 215 plant species combined from the four biomes.
Species Number	Biomes	Family name	Genus name	Species name
1	Tropical rainforest	Moraceae	Ficus	Ficus langkokensis
2	Tropical rainforest	Thymelaeaceae	Aquilaria	Aquilaria sinensis
3	Tropical rainforest	Apocynaceae	Wrightia	Wrightia laevis
4	Tropical rainforest	Rutaceae	Acronychia	Acronychia oligophlebia
5	Tropical rainforest	Icacinaceae	Gomphandra	Gomphandra tetrandra
6	Tropical rainforest	Meliaceae	Dysoxylum	Dysoxylum binectariferum
7	Tropical rainforest	Myrsinaceae	Ardisia	Ardisia elegans
8	Tropical rainforest	Rutaceae	Acronychia	Acronychia pedunculata
9	Tropical rainforest	Apocynaceae	Ervatamia	Ervatamia officinalis
10	Tropical rainforest	Rubiaceae	Psychotria	Psychotria rubra
11	Tropical rainforest	Rubiaceae	Lasianthus	Lasianthus koi
12	Tropical rainforest	Melastomataceae	Blastus	Blastus cochinchinensis
13	Tropical rainforest	Araliaceae	Schefflera	Schefflera heptaphylla
14	Tropical rainforest	Palmae	Pinanga	Pinanga discolor
15	Tropical rainforest	Sabiaceae	Meliosma	Meliosma angustifolia
16	Tropical rainforest	Meliaceae	Heynea	Heynea trijuga
17	Tropical rainforest	Annoceae	Polyalthia	Polyalthia laui
18	Tropical rainforest	Icacinaceae	Platea	Platea latifolia
19	Tropical rainforest	Ulmaceae	Gironniera	Gironniera subaequalis
20	Tropical rainforest	Symplocaceae	Symplocos	Symplocos cochinchinensis
21	Tropical rainforest	Lauraceae	Litsea	Litsea baviensis
22	Tropical rainforest	Rubiaceae	Aidia	Aidia canthioides
23	Tropical rainforest	Ebenaceae	Diospyros	Diospyros maclurei
24	Tropical rainforest	Lauraceae	Cryptocarya	Cryptocarya chinensis
25	Tropical rainforest	Symplocaceae	Symplocos	Symplocos poilanei
26	Tropical rainforest	Apocynaceae	Winchia	Winchia calophylla
27	Tropical rainforest	Tiliaceae	Microcos	Microcos chungii
28	Tropical rainforest	Euphorbiaceae	Epiprinus	Epiprinus siletianus
29	Tropical rainforest	Moraceae	Ficus	Ficus vasculosa
30	Tropical rainforest	Euphorbiaceae	Mallotus	Mallotus hookerianus
31	Tropical rainforest	Euphorbiaceae	Antidesma	Antidesma montanum
32	Tropical rainforest	Rhizophoraceae	Carallia	Carallia brachiata
33	Tropical rainforest	Sapotaceae	Sarcosperma	Sarcosperma laurinum
34	Tropical rainforest	Theaceae	Camellia	Camellia sinensis
35	Tropical rainforest	Melastomataceae	Allomorphia	Allomorphia balansae
36	Tropical rainforest	Rubiaceae	Saprosma	Saprosma merrillii
37	Tropical rainforest	Saxifragaceae	Polyosma	Polyosma cambodiana
38	Tropical rainforest	Symplocaceae	Symplocos	Symplocos laurina
39	Tropical rainforest	Rubiaceae	Saprosma	Saprosma crassipes
40	Tropical rainforest	Rubiaceae	Randia	Randia oxyodonta
41	Tropical rainforest	Illiciaceae	Illicium	Illicium ternstroemioides
42	Tropical rainforest	Rubiaceae	Saprosma	Saprosma ternatum
43	Tropical rainforest	Proteaceae	Helicia	Helicia hainanensis
44	Tropical rainforest	Myrtaceae	Acmena	Acmena acuminatssima
45	Tropical rainforest	Rubiaceae	Aidia	Aidia salicifolia
46	Tropical rainforest	Symplocaceae	Symplocos	Symplocos lancifolia
47	Tropical rainforest	Symplocaceae	Symplocos	Symplocos ovatilobata
48	Tropical rainforest	Rubiaceae	Prismatomeris	Prismatomeris tetrantra
49	Tropical rainforest	Proteaceae	Helicia	Helicia cochinchinensis
50	Tropical rainforest	Oleaceae	Olea	Olea dioica
51	Tropical rainforest	Theaceae	Eurya	Eurya loquaiana
52	Tropical rainforest	Burseraceae	Canarium	Canarium album
53	Tropical rainforest	Juglandaceae	Engelhardia	Engelhardia roxburghiana
54	Tropical rainforest	Fabaceae	Ormosia	Ormosia fordiana
55	Tropical rainforest	Sapindaceae	Nephelium	Nephelium topengii
56	Tropical rainforest	Icacinaceae	Platea	Platea parvifolia
57	Tropical rainforest	Meliaceae	Walsura	Walsura robusta
58	Tropical rainforest	Sterculiaceae	Reevesia	Reevesia longipetiolata
59	Tropical rainforest	Myrtaceae	Cleistocalyx	Cleistocalyx conspersipunctatus
60	Tropical rainforest	Lauraceae	Alseodaphne	Alseodaphne hainanensis
61	Tropical rainforest	Lauraceae	Machilus	Machilus robusta
62	Tropical rainforest	Theaceae	Schima	Schima superba
63	Tropical rainforest	Theaceae	Adinandra	Adinandra hainanensis
64	Tropical rainforest	Fabaceae	Ormosia	Ormosia semicastrata
65	Tropical rainforest	Sapindaceae	Litchi	Litchi chinensis
66	Tropical rainforest	Lauraceae	Beilschmiedia	Beilschmiedia laevis
67	Tropical rainforest	Rubiaceae	Canthium	Canthium simile
68	Tropical rainforest	Fagaceae	Castanopsis	Castanopsis hystrix
69	Tropical rainforest	Aquifoliaceae	Ilex	Ilex dolichopoda
70	Tropical rainforest	Aquifoliaceae	Ilex	Ilex kobuskiana
71	Tropical rainforest	Lauraceae	Lindera	Lindera kwangtungensis
72	Tropical rainforest	Symplocaceae	Symplocos	Symplocos adenophylla
73	Tropical rainforest	Clusiaceae	Garcinia	Garcinia oblongifolia
74	Tropical rainforest	Moraceae	Artocarpus	Artocarpus styracifoliius
75	Tropical rainforest	Aquifoliaceae	Ilex	Ilex angulata
76	Tropical rainforest	Ebenaceae	Diospyros	Diospyros cathayensis
77	Tropical rainforest	Fagaceae	Castanopsis	Castanopsis carlesii
78	Tropical rainforest	Aquifoliaceae	Ilex	Ilex goshiensis
79	Tropical rainforest	Myrtaceae	Syzygium	Syzygium chunianum
80	Tropical rainforest	Lauraceae	Neolitsea	Neolitsea cambodiana
81	Tropical rainforest	Aquifoliaceae	Ilex	Ilex triflora
82	Tropical rainforest	Polygalaceae	Xanthophyllum	Xanthophyllum hainanenes
83	Tropical rainforest	Aquifoliaceae	Ilex	Ilex pubilimba
84	Tropical rainforest	Myrtaceae	Syzygium	Syzygium odoratum
85	Tropical rainforest	Myrsinaceae	Ardisia	Ardisia quinquegona
86	Tropical rainforest	Lauraceae	Neolitsea	Neolitsea hainanensis
87	Tropical rainforest	Lauraceae	Neolitsea	Neolitsea oblongifolia
88	Tropical rainforest	Lauraceae	Cinnamomum	Cinnamomum tsoi
89	Tropical rainforest	Myrtaceae	Syzygium	Syzygium araiocladum
90	Tropical rainforest	Myrtaceae	Syzygium	Syzygium championii
91	Tropical rainforest	Melastomataceae	Memecylon	Memecylon ligustrifolium
92	Tropical rainforest	Magnoliaceae	Michelia	Michelia mediocris
93	Tropical rainforest	Lauraceae	Phoebe	Phoebe hungmoensis
94	Tropical rainforest	Fagaceae	Castanopsis	Castanopsis tonkinensis
95	Tropical rainforest	Fagaceae	Lithocarpus	Lithocarpus fenzelianus
96	Tropical rainforest	Fagaceae	Cyclobalanopsis	Cyclobalanopsis patelliformis
97	Tropical rainforest	Fagaceae	Cyclobalanopsis	Cyclobalanopsis blakei
98	Tropical rainforest	Lauraceae	Neolitsea	Neolitsea ellipsoidea
99	Tropical rainforest	Lauraceae	Machilus	Machilus chinensis
100	Tropical rainforest	Theaceae	Pentaphylax	Pentaphylax euryoides
101	Tropical rainforest	Lauraceae	Machilus	Machilus monticola
102	Tropical rainforest	Myrtaceae	Syzygium	Syzygium buxifolium
103	Subtropical evergreen-deciduous broadleaved mixed forest	Rosaceae	Stranvaesia	Stranvaesia davidiana
104	Subtropical evergreen-deciduous broadleaved mixed forest	Ericaceae	Rhododendron	Rhododendron simsii
105	Subtropical evergreen-deciduous broadleaved mixed forest	Ericaceae	Rhododendron	Rhododendron mariesii
106	Subtropical evergreen-deciduous broadleaved mixed forest	Caprifoliaceae	Viburnum	Viburnum erosum
107	Subtropical evergreen-deciduous broadleaved mixed forest	Symplocaceae	Symplocos	Symplocos anomala
108	Subtropical evergreen-deciduous broadleaved mixed forest	Aquifoliaceae	Ilex	Ilex pernyi
109	Subtropical evergreen-deciduous broadleaved mixed forest	Theaceae	Camellia	Camellia cuspidata
110	Subtropical evergreen-deciduous broadleaved mixed forest	Theaceae	Eurya	Eurya loquaiana
111	Subtropical evergreen-deciduous broadleaved mixed forest	Pittosporaceae	Pittosporum	Pittosporum glabratum
112	Subtropical evergreen-deciduous broadleaved mixed forest	Theaceae	Eurya	Eurya alata
113	Subtropical evergreen-deciduous broadleaved mixed forest	Rosaceae	Photinia	Photinia schneideriana
114	Subtropical evergreen-deciduous broadleaved mixed forest	Fagaceae	Cyclobalanopsis	Cyclobalanopsis myrsinifolia
115	Subtropical evergreen-deciduous broadleaved mixed forest	Fagaceae	Quercus	Quercus engleriana
116	Subtropical evergreen-deciduous broadleaved mixed forest	Rosaceae	Photinia	Photinia parvifolia
117	Subtropical evergreen-deciduous broadleaved mixed forest	Symplocaceae	Symplocos	Symplocos sumuntia
118	Subtropical evergreen-deciduous broadleaved mixed forest	Ericaceae	Staggerbush	Staggerbush ovalifolia
119	Subtropical evergreen-deciduous broadleaved mixed forest	Symplocaceae	Symplocos	Symplocos lucida
120	Subtropical evergreen-deciduous broadleaved mixed forest	Caprifoliaceae	Viburnum	Viburnum sympodiale
121	Subtropical evergreen-deciduous broadleaved mixed forest	Caprifoliaceae	Viburnum	Viburnum setigerum
122	Subtropical evergreen-deciduous broadleaved mixed forest	Caprifoliaceae	Viburnum	Viburnum dilatatum
123	Subtropical evergreen-deciduous broadleaved mixed forest	Ericaceae	Rhododendron	Rhododendron stamineum
124	Subtropical evergreen-deciduous broadleaved mixed forest	Rosaceae	Sorbus	Sorbus folgneri
125	Subtropical evergreen-deciduous broadleaved mixed forest	Cornaceae	Cornus	Cornus kousa
126	Subtropical evergreen-deciduous broadleaved mixed forest	Symplocaceae	Symplocos	Symplocos crassifolia
127	Subtropical evergreen-deciduous broadleaved mixed forest	Symplocaceae	Symplocos	Symplocos phyllocalyx
128	Subtropical evergreen-deciduous broadleaved mixed forest	Lauraceae	Neolitsea	Neolitsea confertifolia
129	Subtropical evergreen-deciduous broadleaved mixed forest	Fagaceae	Fagus	Fagus lucida
130	Subtropical evergreen-deciduous broadleaved mixed forest	Lauraceae	Cinnamomum	Cinnamomum wilsonii
131	Subtropical evergreen-deciduous broadleaved mixed forest	Rosaceae	Sorbus	Sorbus pohuashanensis
132	Subtropical evergreen-deciduous broadleaved mixed forest	Fagaceae	Lithocarpus	Lithocarpus henryi
133	Subtropical evergreen-deciduous broadleaved mixed forest	Fagaceae	Cyclobalanopsis	Cyclobalanopsis multinervis
134	Subtropical evergreen-deciduous broadleaved mixed forest	Fagaceae	Lithocarpus	Lithocarpus cleistocarpus
135	Subtropical evergreen-deciduous broadleaved mixed forest	Fagaceae	Cyclobalanopsis	Cyclobalanopsis glauca
136	Subtropical evergreen-deciduous broadleaved mixed forest	Fagaceae	Quercus	Quercus fabri
137	Subtropical evergreen-deciduous broadleaved mixed forest	Lauraceae	Litsea	Litsea elongata
138	Subtropical evergreen-deciduous broadleaved mixed forest	Lauraceae	Lindera	Lindera pulcherrima
139	Subtropical evergreen-deciduous broadleaved mixed forest	Hamamelidaceae	Corylopsis	Corylopsis sinensis
140	Subtropical evergreen-deciduous broadleaved mixed forest	Symplocaceae	Symplocos	Symplocos paniculata
141	Subtropical evergreen-deciduous broadleaved mixed forest	Clethraceae	Clethra	Clethra fargesii
142	Subtropical evergreen-deciduous broadleaved mixed forest	Cornaceae	Cornus	Cornus controversum
143	Subtropical evergreen-deciduous broadleaved mixed forest	Rosaceae	Padus	Padus racemosa
144	Subtropical evergreen-deciduous broadleaved mixed forest	Betulaceae	Betula	Betula luminifera
145	Subtropical evergreen-deciduous broadleaved mixed forest	Betulaceae	Carpinus	Carpinus fargesiana
146	Subtropical evergreen-deciduous broadleaved mixed forest	Daphniphyllaceae	Daphniphyllum	Daphniphyllum oldhami
147	Subtropical evergreen-deciduous broadleaved mixed forest	Rosaceae	Sorbus	Sorbus megalocarpa
148	Subtropical evergreen-deciduous broadleaved mixed forest	Aceraceae	Acer	Acer davidii
149	Subtropical evergreen-deciduous broadleaved mixed forest	Lauraceae	Machilus	Machilus ichangensis
150	Subtropical evergreen-deciduous broadleaved mixed forest	Daphniphyllaceae	Daphniphyllum	Daphniphyllum macropodum
151	Subtropical evergreen-deciduous broadleaved mixed forest	Fagaceae	Fagus	Fagus engleriana
152	Subtropical evergreen-deciduous broadleaved mixed forest	Theaceae	Schima	Schima superba
153	Subtropical evergreen-deciduous broadleaved mixed forest	Rosaceae	Sorbus	Sorbus wilsoniana
154	Subtropical evergreen-deciduous broadleaved mixed forest	Fagaceae	Castanea	Castanea henryi
155	Subtropical evergreen-deciduous broadleaved mixed forest	Lauraceae	Litsea	Litsea pungens
156	Subtropical evergreen-deciduous broadleaved mixed forest	Coriariaceae	Coriaria	Coriaria nepalensis
157	Subtropical evergreen-deciduous broadleaved mixed forest	Ericaceae	Enkianthus	Enkianthus serrulatus
158	Subtropical evergreen-deciduous broadleaved mixed forest	Moraceae	Ficus	Ficus heteromorpha
159	Subtropical evergreen-deciduous broadleaved mixed forest	Rosaceae	Cerasus	Cerasus conradinae
160	Subtropical evergreen-deciduous broadleaved mixed forest	Lauraceae	Lindera	Lindera obtusiloba
161	Subtropical evergreen-deciduous broadleaved mixed forest	Oleaceae	Fraxinus	Fraxinus insularis
162	Subtropical evergreen-deciduous broadleaved mixed forest	Nyssaceae	Davidia	Davidia involucrata
163	Subtropical evergreen-deciduous broadleaved mixed forest	Juglandaceae	Cyclocarya	Cyclocarya paliurus
164	Subtropical evergreen-deciduous broadleaved mixed forest	Staphyleaceae	Euscaphis	Euscaphis japonica
165	Subtropical evergreen-deciduous broadleaved mixed forest	Tiliaceae	Tilia	Tilia oliveri
166	Warm-temperate coniferous-broadleaved mixed forest	Stachyuraceae	Stachyurus	Stachyurus chinensis
167	Warm-temperate coniferous-broadleaved mixed forest	Cornaceae	Helwingia	Helwingia japonica
168	Warm-temperate coniferous-broadleaved mixed forest	Celastraceae	Euonymus	Euonymus sanguineus
169	Warm-temperate coniferous-broadleaved mixed forest	Celastraceae	Euonymus	Euonymus frigidus
170	Warm-temperate coniferous-broadleaved mixed forest	Rosaceae	Rosa	Rosa sweginzowii
171	Warm-temperate coniferous-broadleaved mixed forest	Rosaceae	Rosa	Rosa omeiensis
172	Warm-temperate coniferous-broadleaved mixed forest	Ericaceae	Rhododendron	Rhododendron minutiflorum
173	Warm-temperate coniferous-broadleaved mixed forest	Sabiaceae	Meliosma	Meliosma cuneifolia
174	Warm-temperate coniferous-broadleaved mixed forest	Betulaceae	Corylus	Corylus mandshurica
175	Warm-temperate coniferous-broadleaved mixed forest	Lauraceae	Lindera	Lindera umbellata
176	Warm-temperate coniferous-broadleaved mixed forest	Salicaceae	Salix	Salix sinopurpurea
177	Warm-temperate coniferous-broadleaved mixed forest	Anacardiaceae	Toxicodendron	Toxicodendron vernicifluum
178	Warm-temperate coniferous-broadleaved mixed forest	Caprifoliaceae	Abelia	Abelia biflora
179	Warm-temperate coniferous-broadleaved mixed forest	Caprifoliaceae	Viburnum	Viburnum betulifolium
180	Warm-temperate coniferous-broadleaved mixed forest	Celastraceae	Euonymus	Euonymus verrucosoides
181	Warm-temperate coniferous-broadleaved mixed forest	Caprifoliaceae	Viburnum	Viburnum lobophyllum
182	Warm-temperate coniferous-broadleaved mixed forest	Caprifoliaceae	Dipelta	Dipelta floribunda
183	Warm-temperate coniferous-broadleaved mixed forest	Symplocaceae	Symplocos	Symplocos paniculata
184	Warm-temperate coniferous-broadleaved mixed forest	Araliaceae	Kalopanax	Kalopanax septemlobus
185	Warm-temperate coniferous-broadleaved mixed forest	Rosaceae	Cerasus	Cerasus polytricha
186	Warm-temperate coniferous-broadleaved mixed forest	Betulaceae	Corylus	Corylus heterophylla
187	Warm-temperate coniferous-broadleaved mixed forest	Aceraceae	Acer	Acer cappadocicum
188	Warm-temperate coniferous-broadleaved mixed forest	Aceraceae	Acer	Acer tetramerum
189	Warm-temperate coniferous-broadleaved mixed forest	Lauraceae	Lindera	Lindera obtusiloba
190	Warm-temperate coniferous-broadleaved mixed forest	Tiliaceae	Tilia	Tilia oliveri
191	Warm-temperate coniferous-broadleaved mixed forest	Celastraceae	Euonymus	Euonymus phellomanus
192	Warm-temperate coniferous-broadleaved mixed forest	Rosaceae	Malus	Malus kansuensis
193	Warm-temperate coniferous-broadleaved mixed forest	Cornaceae	Cornus	Cornus kousa
194	Warm-temperate coniferous-broadleaved mixed forest	Rosaceae	Cotoneaster	Cotoneaster acuminatus
195	Warm-temperate coniferous-broadleaved mixed forest	Rosaceae	Malus	Malus hupehensis
196	Warm-temperate coniferous-broadleaved mixed forest	Rosaceae	Crataegus	Crataegus wilsonii
197	Warm-temperate coniferous-broadleaved mixed forest	Pinaceae	Pinus	Pinus armandii
198	Warm-temperate coniferous-broadleaved mixed forest	Rosaceae	Cotoneaster	Cotoneaster multiflorus
199	Warm-temperate coniferous-broadleaved mixed forest	Rosaceae	Crataegus	Crataegus kansuensis
200	Warm-temperate coniferous-broadleaved mixed forest	Rosaceae	Sorbus	Sorbus hupehensis
201	Warm-temperate coniferous-broadleaved mixed forest	Aceraceae	Acer	Acer caudatum
202	Warm-temperate coniferous-broadleaved mixed forest	Rosaceae	Sorbus	Sorbus folgneri
203	Warm-temperate coniferous-broadleaved mixed forest	Rosaceae	Cerasus	Cerasus clarofolia
204	Warm-temperate coniferous-broadleaved mixed forest	Cornaceae	Swida	Swida hemsleyi
205	Warm-temperate coniferous-broadleaved mixed forest	Betulaceae	Betula	Betula platyphylla
206	Warm-temperate coniferous-broadleaved mixed forest	Aceraceae	Acer	Acer davidii
207	Warm-temperate coniferous-broadleaved mixed forest	Pinaceae	Pinus	Pinus tabuliformis
208	Warm-temperate coniferous-broadleaved mixed forest	Rosaceae	Sorbus	Sorbus alnifolia
209	Warm-temperate coniferous-broadleaved mixed forest	Rosaceae	Amelanchier	Amelanchier sinica
210	Warm-temperate coniferous-broadleaved mixed forest	Betulaceae	Carpinus	Carpinus hupeana
211	Warm-temperate coniferous-broadleaved mixed forest	Betulaceae	Carpinus	Carpinus turczaninowii
212	Warm-temperate coniferous-broadleaved mixed forest	Betulaceae	Ostrya	Ostrya japonica
213	Warm-temperate coniferous-broadleaved mixed forest	Aceraceae	Acer	Acer mono
214	Warm-temperate coniferous-broadleaved mixed forest	Fagaceae	Quercus	Quercus aliena
215	Warm-temperate coniferous-broadleaved mixed forest	Betulaceae	Carpinus	Carpinus cordata
216	Warm-temperate coniferous-broadleaved mixed forest	Fagaceae	Quercus	Quercus wutaishanica
217	Warm-temperate coniferous-broadleaved mixed forest	Fagaceae	Quercus	Quercus spinosa
218	Cold-temperate coniferous forest	Pinaceae	Picea	Picea asperata
219	Cold-temperate coniferous forest	Pinaceae	Pinus	Pinus koraiensis
220	Cold-temperate coniferous forest	Caprifoliaceae	Lonicera	Lonicera caerulea
221	Cold-temperate coniferous forest	Betulaceae	Betula	Betula pendula
222	Cold-temperate coniferous forest	Pinaceae	Larix	Larix gmelinii
223	Cold-temperate coniferous forest	Salicaceae	Salix	Salix paraphylicifolia
Eight species occurr at two sites: Eurya loquaiana, Schima superba, Sorbus folgneri, Cornus kousa, Symplocos paniculata, Acer davidii, Lindera obtusiloba, and Tilia oliveri.

## Sheet: Table S2
Table S2 The plant species in the same plot of each biome.
Plot number	Species number	Biomes	Family name	Genus name	Species name
Ⅰ	48	Tropical rainforest	Rubiaceae	Prismatomeris	Prismatomeris tetrantra
Ⅰ	51	Tropical rainforest	Theaceae	Eurya	Eurya loquaiana
Ⅰ	50	Tropical rainforest	Oleaceae	Olea	Olea dioica
Ⅰ	47	Tropical rainforest	Symplocaceae	Symplocos	Symplocos ovatilobata
Ⅰ	49	Tropical rainforest	Proteaceae	Helicia	Helicia cochinchinensis
Ⅱ	30	Tropical rainforest	Euphorbiaceae	Mallotus	Mallotus hookerianus
Ⅱ	36	Tropical rainforest	Rubiaceae	Saprosma	Saprosma merrillii
Ⅱ	42	Tropical rainforest	Rubiaceae	Saprosma	Saprosma ternatum
Ⅱ	28	Tropical rainforest	Euphorbiaceae	Epiprinus	Epiprinus siletianus
Ⅱ	40	Tropical rainforest	Rubiaceae	Randia	Randia oxyodonta
Ⅱ	43	Tropical rainforest	Proteaceae	Helicia	Helicia hainanensis
Ⅱ	33	Tropical rainforest	Sapotaceae	Sarcosperma	Sarcosperma laurinum
Ⅱ	34	Tropical rainforest	Theaceae	Camellia	Camellia sinensis
Ⅱ	44	Tropical rainforest	Myrtaceae	Acmena	Acmena acuminatssima
Ⅱ	41	Tropical rainforest	Illiciaceae	Illicium	Illicium ternstroemioides
Ⅱ	46	Tropical rainforest	Symplocaceae	Symplocos	Symplocos lancifolia
Ⅱ	39	Tropical rainforest	Rubiaceae	Saprosma	Saprosma crassipes
Ⅱ	35	Tropical rainforest	Melastomataceae	Allomorphia	Allomorphia balansae
Ⅱ	29	Tropical rainforest	Moraceae	Ficus	Ficus vasculosa
Ⅱ	38	Tropical rainforest	Symplocaceae	Symplocos	Symplocos laurina
Ⅱ	45	Tropical rainforest	Rubiaceae	Aidia	Aidia salicifolia
Ⅱ	31	Tropical rainforest	Euphorbiaceae	Antidesma	Antidesma montanum
Ⅱ	37	Tropical rainforest	Saxifragaceae	Polyosma	Polyosma cambodiana
Ⅱ	32	Tropical rainforest	Rhizophoraceae	Carallia	Carallia brachiata
Ⅲ	24	Tropical rainforest	Lauraceae	Cryptocarya	Cryptocarya chinensis
Ⅲ	21	Tropical rainforest	Lauraceae	Litsea	Litsea baviensis
Ⅲ	19	Tropical rainforest	Ulmaceae	Gironniera	Gironniera subaequalis
Ⅲ	27	Tropical rainforest	Tiliaceae	Microcos	Microcos chungii
Ⅲ	22	Tropical rainforest	Rubiaceae	Aidia	Aidia canthioides
Ⅲ	26	Tropical rainforest	Apocynaceae	Winchia	Winchia calophylla
Ⅲ	18	Tropical rainforest	Icacinaceae	Platea	Platea latifolia
Ⅲ	23	Tropical rainforest	Ebenaceae	Diospyros	Diospyros maclurei
Ⅲ	25	Tropical rainforest	Symplocaceae	Symplocos	Symplocos poilanei
Ⅲ	20	Tropical rainforest	Symplocaceae	Symplocos	Symplocos cochinchinensis
Ⅳ	17	Tropical rainforest	Annoceae	Polyalthia	Polyalthia laui
Ⅳ	15	Tropical rainforest	Sabiaceae	Meliosma	Meliosma angustifolia
Ⅳ	16	Tropical rainforest	Meliaceae	Heynea	Heynea trijuga
Ⅴ	91	Tropical rainforest	Melastomataceae	Memecylon	Memecylon ligustrifolium
Ⅴ	88	Tropical rainforest	Lauraceae	Cinnamomum	Cinnamomum tsoi
Ⅴ	89	Tropical rainforest	Myrtaceae	Syzygium	Syzygium araiocladum
Ⅴ	90	Tropical rainforest	Myrtaceae	Syzygium	Syzygium championii
Ⅵ	82	Tropical rainforest	Polygalaceae	Xanthophyllum	Xanthophyllum hainanenes
Ⅵ	85	Tropical rainforest	Myrsinaceae	Ardisia	Ardisia quinquegona
Ⅵ	72	Tropical rainforest	Symplocaceae	Symplocos	Symplocos adenophylla
Ⅵ	76	Tropical rainforest	Ebenaceae	Diospyros	Diospyros cathayensis
Ⅵ	79	Tropical rainforest	Myrtaceae	Syzygium	Syzygium chunianum
Ⅵ	73	Tropical rainforest	Clusiaceae	Garcinia	Garcinia oblongifolia
Ⅵ	77	Tropical rainforest	Fagaceae	Castanopsis	Castanopsis carlesii
Ⅵ	78	Tropical rainforest	Aquifoliaceae	Ilex	Ilex goshiensis
Ⅵ	70	Tropical rainforest	Aquifoliaceae	Ilex	Ilex kobuskiana
Ⅵ	80	Tropical rainforest	Lauraceae	Neolitsea	Neolitsea cambodiana
Ⅵ	69	Tropical rainforest	Aquifoliaceae	Ilex	Ilex dolichopoda
Ⅵ	81	Tropical rainforest	Aquifoliaceae	Ilex	Ilex triflora
Ⅵ	84	Tropical rainforest	Myrtaceae	Syzygium	Syzygium odoratum
Ⅵ	74	Tropical rainforest	Moraceae	Artocarpus	Artocarpus styracifoliius
Ⅵ	83	Tropical rainforest	Aquifoliaceae	Ilex	Ilex pubilimba
Ⅵ	86	Tropical rainforest	Lauraceae	Neolitsea	Neolitsea hainanensis
Ⅵ	75	Tropical rainforest	Aquifoliaceae	Ilex	Ilex angulata
Ⅵ	71	Tropical rainforest	Lauraceae	Lindera	Lindera kwangtungensis
Ⅵ	87	Tropical rainforest	Lauraceae	Neolitsea	Neolitsea oblongifolia
Ⅶ	66	Tropical rainforest	Lauraceae	Beilschmiedia	Beilschmiedia laevis
Ⅶ	64	Tropical rainforest	Fabaceae	Ormosia	Ormosia semicastrata
Ⅶ	60	Tropical rainforest	Lauraceae	Alseodaphne	Alseodaphne hainanensis
Ⅶ	59	Tropical rainforest	Myrtaceae	Cleistocalyx	Cleistocalyx conspersipunctatus
Ⅶ	61	Tropical rainforest	Lauraceae	Machilus	Machilus robusta
Ⅶ	63	Tropical rainforest	Theaceae	Adinandra	Adinandra hainanensis
Ⅶ	67	Tropical rainforest	Rubiaceae	Canthium	Canthium simile
Ⅶ	62	Tropical rainforest	Theaceae	Schima	Schima superba
Ⅶ	68	Tropical rainforest	Fagaceae	Castanopsis	Castanopsis hystrix
Ⅶ	65	Tropical rainforest	Sapindaceae	Litchi	Litchi chinensis
Ⅷ	55	Tropical rainforest	Sapindaceae	Nephelium	Nephelium topengii
Ⅷ	57	Tropical rainforest	Meliaceae	Walsura	Walsura robusta
Ⅷ	58	Tropical rainforest	Sterculiaceae	Reevesia	Reevesia longipetiolata
Ⅷ	54	Tropical rainforest	Fabaceae	Ormosia	Ormosia fordiana
Ⅷ	56	Tropical rainforest	Icacinaceae	Platea	Platea parvifolia
Ⅰ	133	Subtropical evergreen-deciduous broadleaved mixed forest	Fagaceae	Cyclobalanopsis	Cyclobalanopsis multinervis
Ⅰ	135	Subtropical evergreen-deciduous broadleaved mixed forest	Fagaceae	Cyclobalanopsis	Cyclobalanopsis glauca
Ⅰ	132	Subtropical evergreen-deciduous broadleaved mixed forest	Fagaceae	Lithocarpus	Lithocarpus henryi
Ⅰ	134	Subtropical evergreen-deciduous broadleaved mixed forest	Fagaceae	Lithocarpus	Lithocarpus cleistocarpus
Ⅱ	125	Subtropical evergreen-deciduous broadleaved mixed forest	Cornaceae	Cornus	Cornus kousa
Ⅱ	129	Subtropical evergreen-deciduous broadleaved mixed forest	Fagaceae	Fagus	Fagus lucida
Ⅱ	124	Subtropical evergreen-deciduous broadleaved mixed forest	Rosaceae	Sorbus	Sorbus folgneri
Ⅱ	127	Subtropical evergreen-deciduous broadleaved mixed forest	Symplocaceae	Symplocos	Symplocos phyllocalyx
Ⅱ	131	Subtropical evergreen-deciduous broadleaved mixed forest	Rosaceae	Sorbus	Sorbus pohuashanensis
Ⅱ	126	Subtropical evergreen-deciduous broadleaved mixed forest	Symplocaceae	Symplocos	Symplocos crassifolia
Ⅱ	128	Subtropical evergreen-deciduous broadleaved mixed forest	Lauraceae	Neolitsea	Neolitsea confertifolia
Ⅱ	130	Subtropical evergreen-deciduous broadleaved mixed forest	Lauraceae	Cinnamomum	Cinnamomum wilsonii
Ⅲ	117	Subtropical evergreen-deciduous broadleaved mixed forest	Symplocaceae	Symplocos	Symplocos sumuntia
Ⅲ	122	Subtropical evergreen-deciduous broadleaved mixed forest	Caprifoliaceae	Viburnum	Viburnum dilatatum
Ⅲ	119	Subtropical evergreen-deciduous broadleaved mixed forest	Symplocaceae	Symplocos	Symplocos lucida
Ⅲ	123	Subtropical evergreen-deciduous broadleaved mixed forest	Ericaceae	Rhododendron	Rhododendron stamineum
Ⅲ	121	Subtropical evergreen-deciduous broadleaved mixed forest	Caprifoliaceae	Viburnum	Viburnum setigerum
Ⅲ	120	Subtropical evergreen-deciduous broadleaved mixed forest	Caprifoliaceae	Viburnum	Viburnum sympodiale
Ⅲ	118	Subtropical evergreen-deciduous broadleaved mixed forest	Ericaceae	Staggerbush	Staggerbush ovalifolia
Ⅳ	116	Subtropical evergreen-deciduous broadleaved mixed forest	Rosaceae	Photinia	Photinia parvifolia
Ⅴ	152	Subtropical evergreen-deciduous broadleaved mixed forest	Theaceae	Schima	Schima superba
Ⅴ	154	Subtropical evergreen-deciduous broadleaved mixed forest	Fagaceae	Castanea	Castanea henryi
Ⅴ	153	Subtropical evergreen-deciduous broadleaved mixed forest	Rosaceae	Sorbus	Sorbus wilsoniana
Ⅵ	149	Subtropical evergreen-deciduous broadleaved mixed forest	Lauraceae	Machilus	Machilus ichangensis
Ⅵ	150	Subtropical evergreen-deciduous broadleaved mixed forest	Daphniphyllaceae	Daphniphyllum	Daphniphyllum macropodum
Ⅵ	151	Subtropical evergreen-deciduous broadleaved mixed forest	Fagaceae	Fagus	Fagus engleriana
Ⅵ	148	Subtropical evergreen-deciduous broadleaved mixed forest	Aceraceae	Acer	Acer davidii
Ⅵ	147	Subtropical evergreen-deciduous broadleaved mixed forest	Rosaceae	Sorbus	Sorbus megalocarpa
Ⅶ	145	Subtropical evergreen-deciduous broadleaved mixed forest	Betulaceae	Carpinus	Carpinus fargesiana
Ⅶ	141	Subtropical evergreen-deciduous broadleaved mixed forest	Clethraceae	Clethra	Clethra fargesii
Ⅶ	146	Subtropical evergreen-deciduous broadleaved mixed forest	Daphniphyllaceae	Daphniphyllum	Daphniphyllum oldhami
Ⅶ	144	Subtropical evergreen-deciduous broadleaved mixed forest	Betulaceae	Betula	Betula luminifera
Ⅶ	139	Subtropical evergreen-deciduous broadleaved mixed forest	Hamamelidaceae	Corylopsis	Corylopsis sinensis
Ⅶ	140	Subtropical evergreen-deciduous broadleaved mixed forest	Symplocaceae	Symplocos	Symplocos paniculata
Ⅶ	142	Subtropical evergreen-deciduous broadleaved mixed forest	Cornaceae	Cornus	Cornus controversum
Ⅶ	143	Subtropical evergreen-deciduous broadleaved mixed forest	Rosaceae	Padus	Padus racemosa
Ⅷ	137	Subtropical evergreen-deciduous broadleaved mixed forest	Lauraceae	Litsea	Litsea elongata
Ⅷ	138	Subtropical evergreen-deciduous broadleaved mixed forest	Lauraceae	Lindera	Lindera pulcherrima
Ⅰ	189	Warm-temperate coniferous-broadleaved mixed forest	Lauraceae	Lindera	Lindera obtusiloba
Ⅰ	190	Warm-temperate coniferous-broadleaved mixed forest	Tiliaceae	Tilia	Tilia oliveri
Ⅰ	188	Warm-temperate coniferous-broadleaved mixed forest	Aceraceae	Acer	Acer tetramerum
Ⅰ	187	Warm-temperate coniferous-broadleaved mixed forest	Aceraceae	Acer	Acer cappadocicum
Ⅱ	186	Warm-temperate coniferous-broadleaved mixed forest	Betulaceae	Corylus	Corylus heterophylla
Ⅱ	185	Warm-temperate coniferous-broadleaved mixed forest	Rosaceae	Cerasus	Cerasus polytricha
Ⅲ	183	Warm-temperate coniferous-broadleaved mixed forest	Symplocaceae	Symplocos	Symplocos paniculata
Ⅲ	182	Warm-temperate coniferous-broadleaved mixed forest	Caprifoliaceae	Dipelta	Dipelta floribunda
Ⅲ	184	Warm-temperate coniferous-broadleaved mixed forest	Araliaceae	Kalopanax	Kalopanax septemlobus
Ⅳ	179	Warm-temperate coniferous-broadleaved mixed forest	Caprifoliaceae	Viburnum	Viburnum betulifolium
Ⅳ	180	Warm-temperate coniferous-broadleaved mixed forest	Celastraceae	Euonymus	Euonymus verrucosoides
Ⅳ	181	Warm-temperate coniferous-broadleaved mixed forest	Caprifoliaceae	Viburnum	Viburnum lobophyllum
Ⅳ	178	Warm-temperate coniferous-broadleaved mixed forest	Caprifoliaceae	Abelia	Abelia biflora
Ⅴ	206	Warm-temperate coniferous-broadleaved mixed forest	Aceraceae	Acer	Acer davidii
Ⅴ	205	Warm-temperate coniferous-broadleaved mixed forest	Betulaceae	Betula	Betula platyphylla
Ⅵ	200	Warm-temperate coniferous-broadleaved mixed forest	Rosaceae	Sorbus	Sorbus hupehensis
Ⅵ	203	Warm-temperate coniferous-broadleaved mixed forest	Rosaceae	Cerasus	Cerasus clarofolia
Ⅵ	204	Warm-temperate coniferous-broadleaved mixed forest	Cornaceae	Swida	Swida hemsleyi
Ⅵ	202	Warm-temperate coniferous-broadleaved mixed forest	Rosaceae	Sorbus	Sorbus folgneri
Ⅵ	201	Warm-temperate coniferous-broadleaved mixed forest	Aceraceae	Acer	Acer caudatum
Ⅶ	197	Warm-temperate coniferous-broadleaved mixed forest	Pinaceae	Pinus	Pinus armandii
Ⅶ	199	Warm-temperate coniferous-broadleaved mixed forest	Rosaceae	Crataegus	Crataegus kansuensis
Ⅶ	198	Warm-temperate coniferous-broadleaved mixed forest	Rosaceae	Cotoneaster	Cotoneaster multiflorus
Ⅶ	196	Warm-temperate coniferous-broadleaved mixed forest	Rosaceae	Crataegus	Crataegus wilsonii
Ⅷ	194	Warm-temperate coniferous-broadleaved mixed forest	Rosaceae	Cotoneaster	Cotoneaster acuminatus
Ⅷ	193	Warm-temperate coniferous-broadleaved mixed forest	Cornaceae	Cornus	Cornus kousa
Ⅷ	191	Warm-temperate coniferous-broadleaved mixed forest	Celastraceae	Euonymus	Euonymus phellomanus
Ⅷ	195	Warm-temperate coniferous-broadleaved mixed forest	Rosaceae	Malus	Malus hupehensis
Ⅷ	192	Warm-temperate coniferous-broadleaved mixed forest	Rosaceae	Malus	Malus kansuensis

## Sheet: Table S3 and S4
Table S3 The percentage variation captured by the first two principal component (PC) axes from a principal component analysis (PCA) performed on the dataset combining all species from the four biomes with three niche dimensions.
Niche dimension	First two PCs	PC 1	PC 2
Leaf economy	Percent	49.75	24.99
	Major eigenvector	SLA	LA
Mechanical support	Percent	96.03	2.46
	Major eigenvector	Plant size	STD
Reproductive phenology	Percent	42.37	25.95
	Major eigenvector	Duration	Time
SLA, specific leaf area; LA, leaf area; Plant size, maximum plant height and diameter at breast height; STD, stem tissue density; Duration, flowering and fruiting duration; Time, mean flowering and fruiting time. The major eigenvectors dominate the functional gradient of the PC axis.
Table S4 Niche variation as modeled by the first two principal component (PC) axes of niche space for all species from the four biomes based on the ‘principal component analysis (PCA) of PCAs’.
	Niche space for the four biomes
PCs	PC 1	PC 2
Eigenvalues	1.5089	1.1986
Percent	25.15	19.98
Eigenvectors
pc1.leaf economy	2.1164	–0.35
pc2.leaf economy	0.309	1.9136
pc1.mechanical support	–1.05	1.4324
pc2.mechanical support	1.8253	0.7393
pc1.reproductive phenology	–0.14	–0.81
pc2.reproductive phenology	–0.38	–0.50
The interpretation of Table 4 depends on Table 3. For example, specific leaf area (SLA) is the main gradient of PC1 in the leaf economy dimension (Table 3). Accordingly, the eigenvector ‘pc1.leaf economy’ represents SLA (Table 4). In the same way, the eigenvector ‘pc2.leaf economy’ represents leaf area (LA). Bold values indicate the leading eigenvectors of each PC axis.
